# Supplementary material
Source: PubMed Central journal article supplement (PMC2587642)

**Web Appendix Figure 1. Median Percent of Injectors who are Black in 95 Large US Metropolitan Statistical Areas Over Time (1992-2002) as Estimated Using Each of Four Methods**  
(The "Index" is the mean of the CTS-, TEDS-, & APIDS-based estimates)

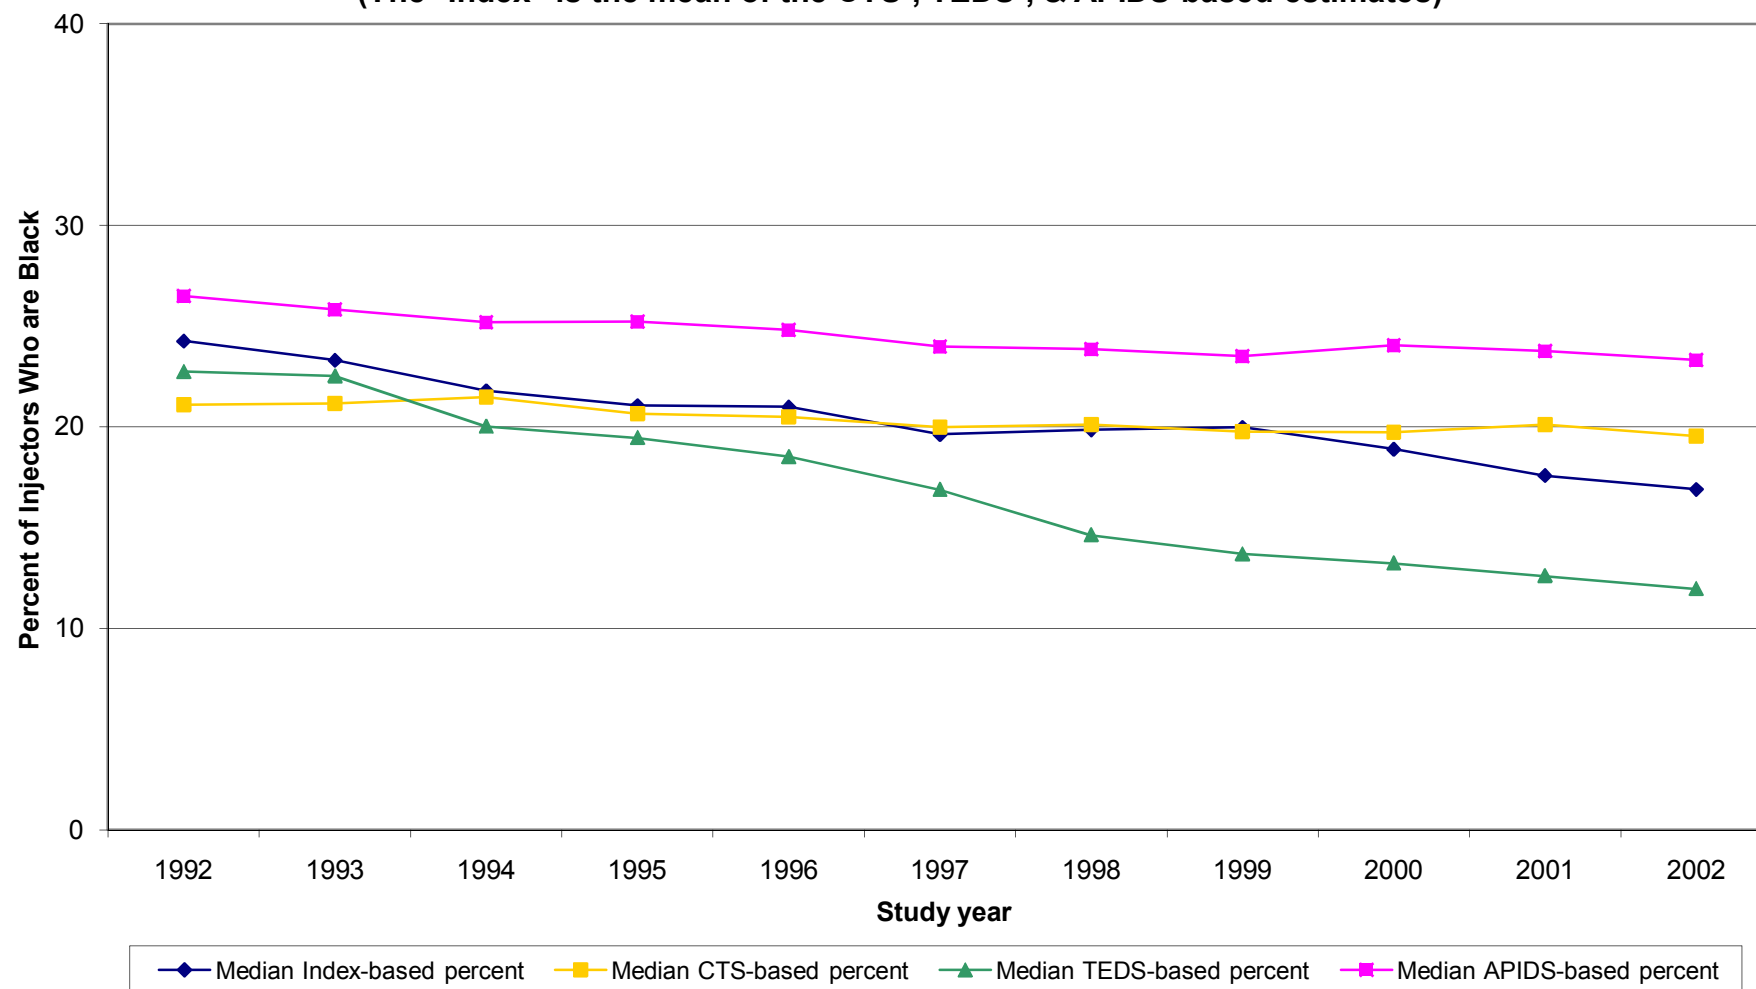

Supplement: 11524_2008_9304_MOESM1_ESM.pdf [file 11524_2008_9304_MOESM1_ESM.pdf]
