# Supplementary material
Source: PubMed Central journal article supplement (PMC2587642)

**Web Appendix Figure 2. Median Percent of Injectors Who Are White in 95 Large US Metropolitan Statistical Areas Over Time (1992-2002) As Estimated Using Four Methods (The "Index" is the average of the CTS-, TEDS-, & APIDS-based Estimates)**

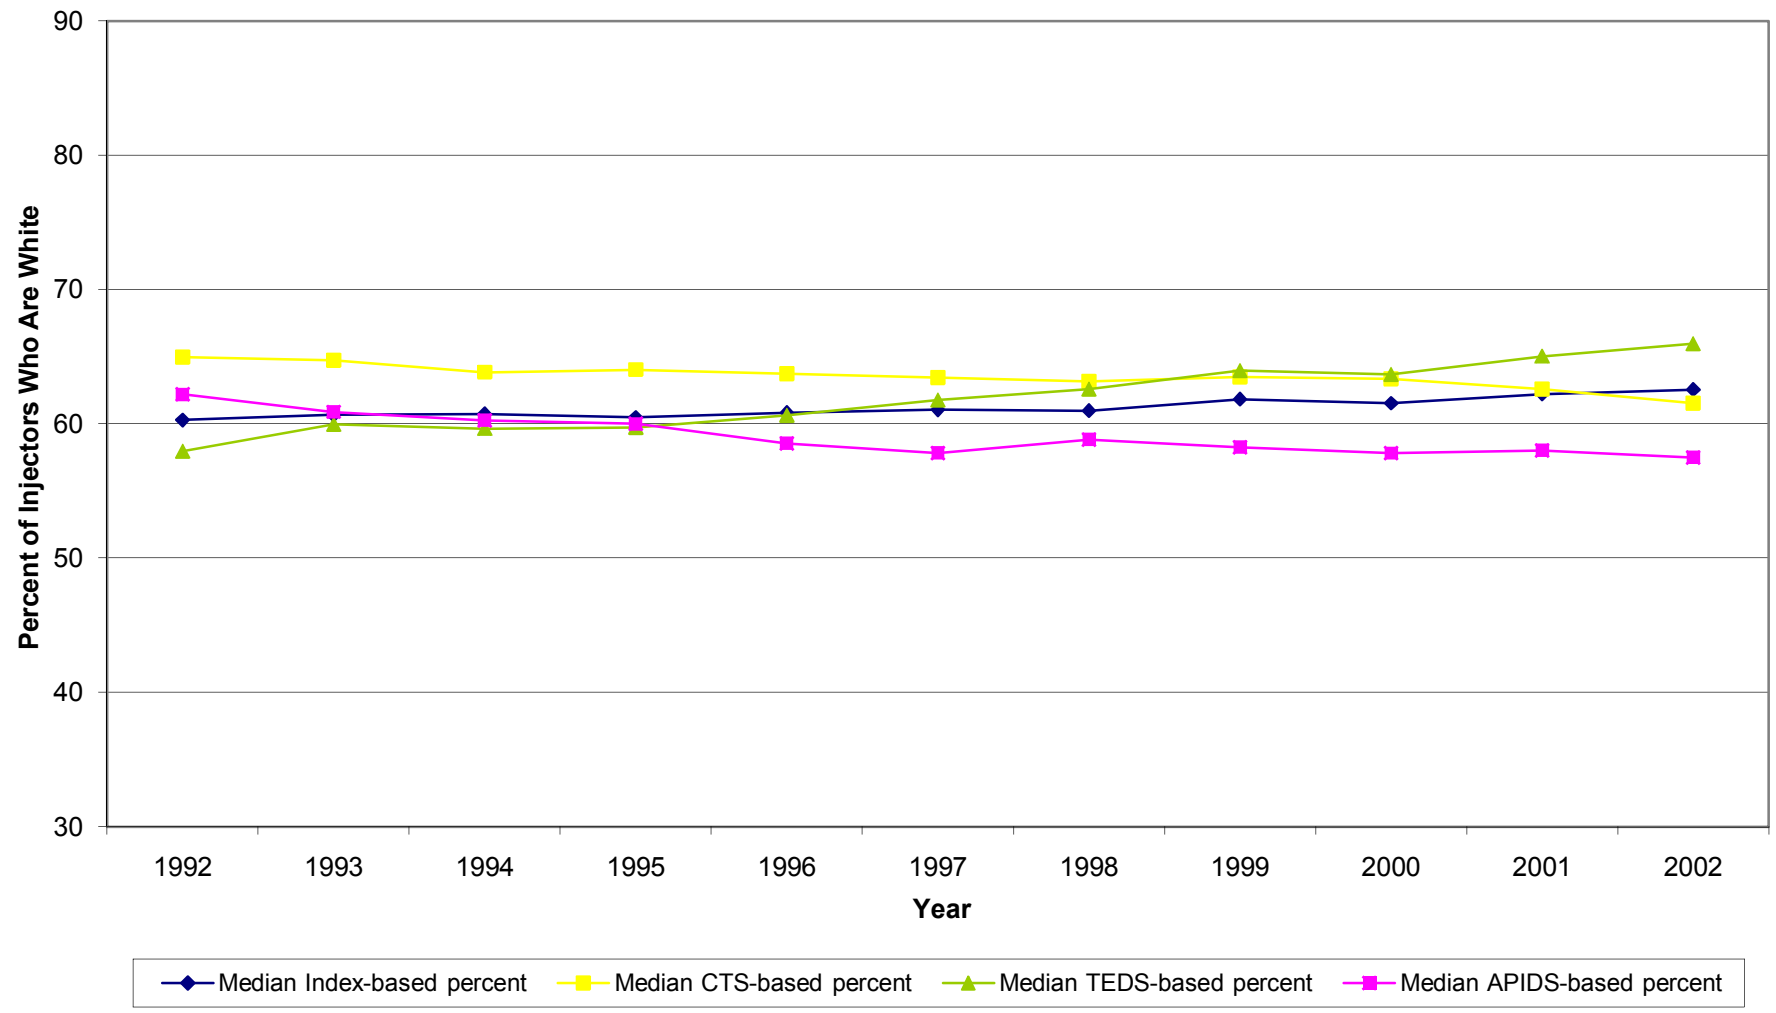

Supplement: 11524_2008_9304_MOESM2_ESM.pdf [file 11524_2008_9304_MOESM2_ESM.pdf]
