# Supplementary material
Source: PubMed Central journal article supplement (PMC2587642)

**Web Appendix Figure 3. Median Number of Injection Drug Users Living in 95 Large US Metropolitan Statistical Areas Over Time (1992-2002), as published in Brady et al, 2008 (see article bibliography for full citation)**

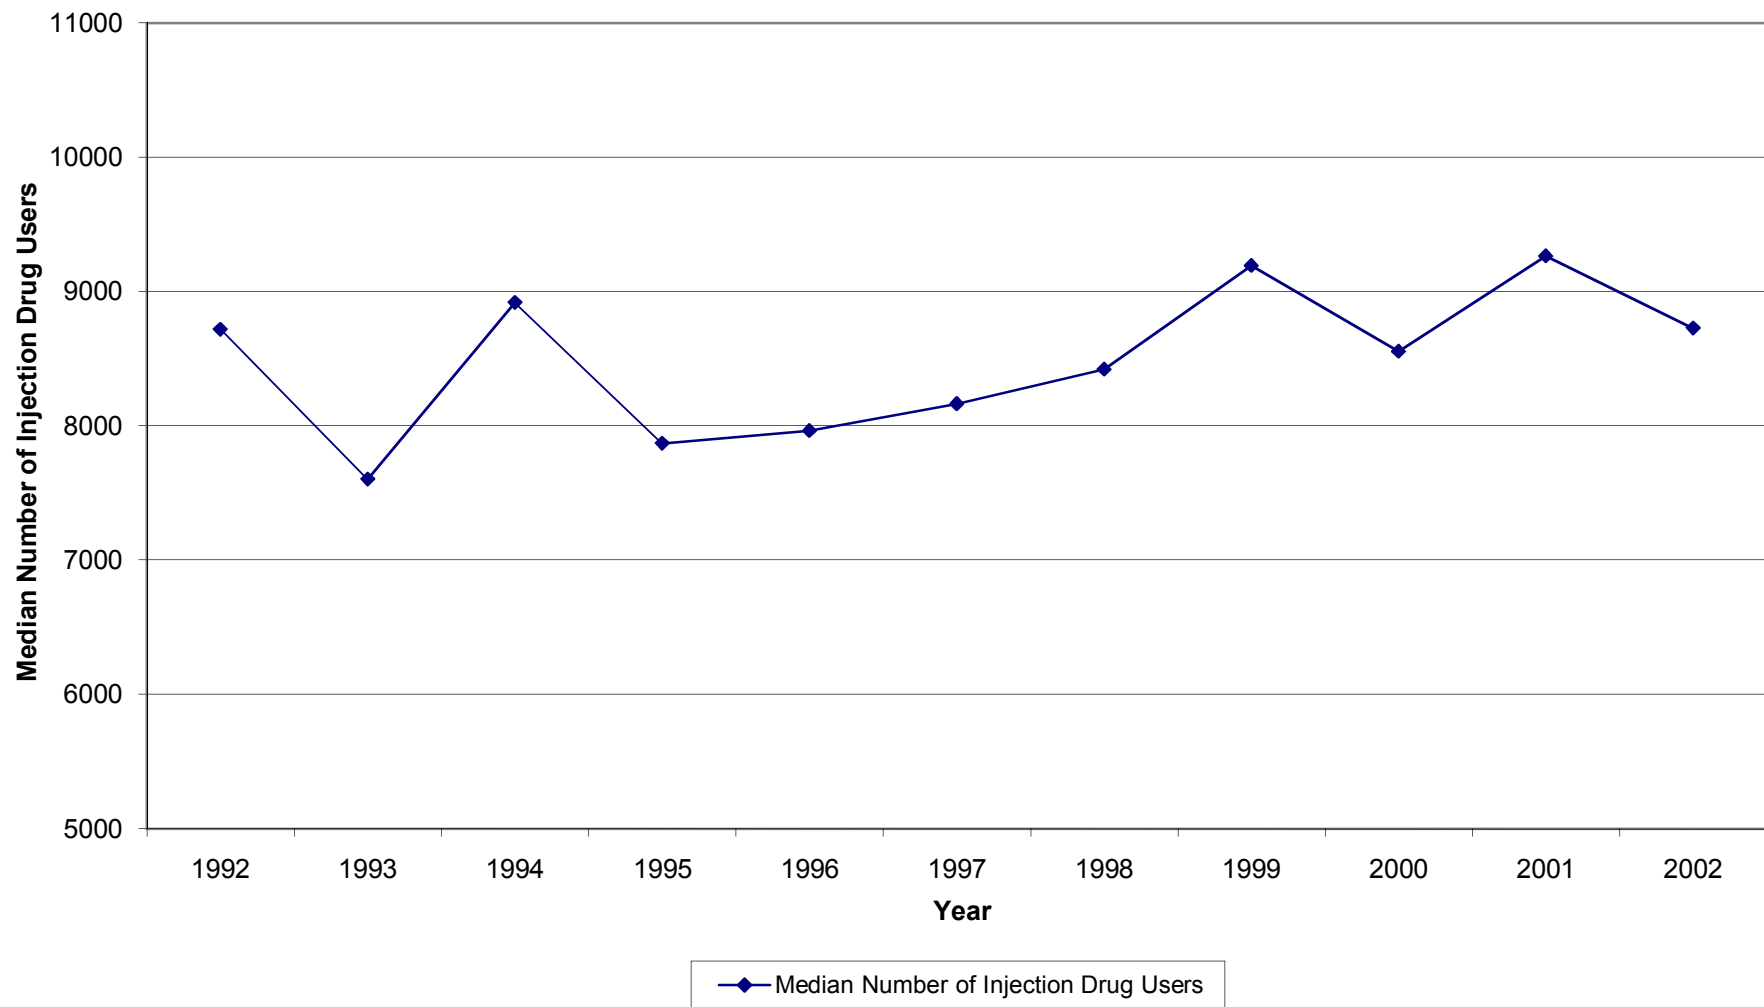

Supplement: 11524_2008_9304_MOESM3_ESM.pdf [file 11524_2008_9304_MOESM3_ESM.pdf]
