# Supplementary material
Source: PubMed Central journal article supplement (PMC2587642)
Supplement: 11524_2008_9304_MOESM4_ESM.pdf [file 11524_2008_9304_MOESM4_ESM.pdf]

**Web Appendix Table 1. Estimated Prevalence of Injection Drug Use per 10,000 Black Adult Residents of 9**

While analyses indicate that project estimates of Black IDU prevalence in the 95 MSAs in the sample have adequate project estimates for a specific MSA or set of MSAs. For the purposes of program planning, policy development, and should be used in concert with other local data sources whenever possible (we note that this may require local data

| <b>MSA name</b>                           | <b>1992</b> | <b>1993</b> | <b>1994</b> | <b>1995</b> | <b>1996</b> |
|-------------------------------------------|-------------|-------------|-------------|-------------|-------------|
| Akron, OH                                 | 166         | 149         | 171         | 153         | 155         |
| Albany--Schenectady--Troy, NY             | 423         | 343         | 322         | 273         | 247         |
| Albuquerque, NM                           | 292         | 258         | 259         | 232         | 216         |
| Allentown--Bethlehem--Easton, PA          | 813*        | 685*        | 767*        | 627*        | 591*        |
| Ann Arbor, MI                             | 141         | 128         | 123         | 119         | 112         |
| Atlanta, GA                               | 187         | 163         | 160         | 137         | 125         |
| Austin--San Marcos, TX                    | 494         | 419         | 458         | 371         | 330         |
| Bakersfield, CA                           | 454         | 390         | 375         | 324         | 298         |
| Baltimore, MD                             | 421"        | 491"        | 478"        | 517"        | 530"        |
| Bergen--Passaic, NJ                       | 243         | 238         | 218         | 208         | 195         |
| Birmingham, AL                            |             | 49          |             |             | 41          |
| Boston, MA--NH                            | 236         | 300         | 222         | 286         | 277         |
| Buffalo--Niagara Falls, NY                | 314         | 351         | 294         | 317         | 298         |
| Charleston--North Charleston, SC          | 121         | 92          | 99          | 78          | 72          |
| Charlotte--Gastonia--Rock Hill, NC--SC    | 166         | 136         | 152         | 129         | 125         |
| Chicago, IL                               | 191         | 164         | 184         | 156         | 150         |
| Cincinnati, OH--KY--IN                    | 209         | 165         | 183         | 144         | 135         |
| Cleveland--Lorain--Elyria, OH             | 235         | 200         | 223         | 192         | 188         |
| Columbus, OH                              | 311         | 273         | 305         | 262         | 255         |
| Dallas, TX                                | 238         | 193         | 230         | 195         | 192         |
| Dayton--Springfield, OH                   | 205         | 176         | 189         | 164         | 161         |
| Denver, CO                                | 389         | 318         | 305         | 279         | 262         |
| Detroit, MI                               | 180         | 186         | 179         | 195         | 201         |
| El Paso, TX                               | 495         | 392         | 445         | 348         | 326         |
| Fort Lauderdale, FL                       | 101         | 76          | 84          | 65          | 64          |
| Fort Worth--Arlington, TX                 | 525         | 424         | 488         | 397         | 384         |
| Fresno, CA                                | 382         | 571         | 453         | 586         | 561         |
| Gary, IN                                  | 225         | 191         | 234         | 218         | 231         |
| Grand Rapids--Muskegon--Holland, MI       | 230         | 184         | 200         | 169         | 161         |
| Greensboro--Winston-Salem--High Point, NC | 162         | 127         | 145         | 115         | 109         |
| Greenville--Spartanburg--Anderson, SC     | 87          | 64          | 71          | 55          | 51          |
| Harrisburg--Lebanon--Carlisle, PA         | 409         | 345         | 392         | 330         | 331         |
| Hartford, CT                              | 374         | 347         | 332         | 305         | 282         |
| Honolulu, HI                              | 355         | 338         | 380         | 343         | 348         |
| Houston, TX                               | 416         | 321         | 398         | 308         | 303         |
| Indianapolis, IN                          | 336         | 295         | 294         | 247         | 224         |
| Jacksonville, FL                          | 297         | 213         | 256         | 193         | 185         |
| Jersey City, NJ                           | 465         | 368         | 387         | 303         | 271         |
| Kansas City, MO--KS                       | 116         | 101         | 110         | 94          | 94          |
| Knoxville, TN                             | 394         | 335         | 356         | 288         | 266         |
| Las Vegas, NV--AZ                         | 293         | 245         | 296         | 250         | 241         |
| Little Rock--North Little Rock, AR        | 253         | 190         | 193         | 152         | 135         |
| Los Angeles--Long Beach, CA               | 239         | 264         | 239         | 264         | 262         |
| Louisville, KY--IN                        | 306         | 249         | 316         | 256         | 252         |
| Memphis, TN--AR--MS                       | 85          | 81          | 77          | 70          | 64          |

|                                               |       |      |      |      |      |
|-----------------------------------------------|-------|------|------|------|------|
| Miami, FL                                     | 301   | 209  | 224  | 156  | 139  |
| Middlesex--Somerset--Hunterdon, NJ            | 218   | 207  | 188  | 179  | 166  |
| Milwaukee--Waukesha, WI                       | 152   | 125  | 145  | 122  | 122  |
| Minneapolis--St. Paul, MN--WI                 | 347   | 249  | 254  | 183  | 163  |
| Monmouth--Ocean, NJ                           | 388   | 318  | 320  | 276  | 255  |
| Nashville, TN                                 | 186   | 169  | 210  | 187  | 194  |
| Nassau--Suffolk, NY                           | 146   | 137  | 129  | 130  | 126  |
| New Haven--Meriden, CT                        | 360   | 313  | 305  | 276  | 257  |
| New Orleans, LA                               | 279   | 221  | 270  | 216  | 213  |
| New York, NY                                  | 279   | 270  | 243  | 236  | 222  |
| Newark, NJ                                    | 400   | 334  | 346  | 295  | 278  |
| Norfolk--Virginia Beach--Newport News, VA--NC | 146   | 141  | 161  | 147  | 150  |
| Oakland, CA                                   | 305   | 376  | 338  | 409  | 422  |
| Oklahoma City, OK                             | 91    | 92   | 74   | 72   | 61   |
| Omaha, NE--IA                                 | 141   | 137  | 120  | 109  | 97   |
| Orange County, CA                             | 188   | 206  | 177  | 191  | 186  |
| Orlando, FL                                   | 126   | 111  | 129  | 111  | 112  |
| Philadelphia, PA--NJ                          | 313   | 293  | 314  | 287  | 282  |
| Phoenix--Mesa, AZ                             | 322   | 295  | 276  | 247  | 227  |
| Pittsburgh, PA                                | 407   | 355  | 390  | 339  | 337  |
| Portland--Vancouver, OR--WA                   | 974^  | 956^ | 743^ | 740^ | 655^ |
| Providence--Fall River--Warwick, RI--MA       | 254   | 272  | 197  | 245  | 234  |
| Raleigh--Durham--Chapel Hill, NC              | 202   | 167  | 201  | 168  | 167  |
| Richmond--Petersburg, VA                      | 246   | 197  | 223  | 181  | 173  |
| Riverside--San Bernardino, CA                 | 142   | 148  | 114  | 121  | 112  |
| Rochester, NY                                 | 336   | 279  | 285  | 238  | 213  |
| Sacramento, CA                                | 289   | 303  | 267  | 285  | 282  |
| St. Louis, MO--IL                             | 219   | 174  | 201  | 162  | 157  |
| Salt Lake City--Ogden, UT                     | 358   | 462  | 359  | 463  | 460  |
| San Antonio, TX                               | 485   | 390  | 370  | 292  | 252  |
| San Diego, CA                                 | 230   | 268  | 242  | 264  | 263  |
| San Francisco, CA                             | 650~  | 774~ | 749~ | 893~ | 952~ |
| San Jose, CA                                  | 292   | 277  | 299  | 272  | 263  |
| Sarasota--Bradenton, FL                       | 141   | 130  | 154  | 141  | 146  |
| Scranton--Wilkes-Barre--Hazleton, PA          | 438   | 402  | 374  | 353  | 319  |
| Seattle--Bellevue--Everett, WA                | 386   | 460  | 367  | 400  | 371  |
| Springfield, MA                               | 289   | 300  | 274  | 299  | 296  |
| Stockton--Lodi, CA                            | 604`  | 573` | 578` | 596` | 597` |
| Syracuse, NY                                  | 321   | 253  | 268  | 216  | 197  |
| Tacoma, WA                                    | 306   | 382  | 262  | 296  | 264  |
| Tampa--St. Petersburg--Clearwater, FL         | 221   | 174  | 209  | 169  | 166  |
| Toledo, OH                                    | 196   | 160  | 179  | 144  | 137  |
| Tucson, AZ                                    | 1050# | 968# | 884# | 788# | 700# |
| Tulsa, OK                                     | 92    | 82   | 85   | 77   | 74   |
| Ventura, CA                                   | 209   | 231  | 176  | 201  | 187  |
| Washington, DC--MD--VA--WV                    | 148   | 131  | 160  | 151  | 160  |
| West Palm Beach--Boca Raton, FL               | 244   | 174  | 195  | 141  | 127  |
| Wichita, KS                                   | 175   | 178  | 161  | 162  | 157  |
| Wilmington--Newark, DE--MD                    | 324   | 240  | 309  | 253  | 257  |
| Youngstown--Warren, OH                        | 96    | 100  | 116  | 113  | 120  |

\*Allentown-Bethlehem-Easton: Some IDU prevalence estimates for this MSA are unusually high compared to project estimates. A local expert indicates that drug treatment programs and HIV counseling and testing programs in this MSA received a high volume of referrals during the study period. This referral pattern might elevate project estimates of IDU prevalence among Black adults. For the purposes of program planning, policy development, and other local activities within this MSA, project estimates should be used in concert with other local data sources (we note that other data sources are available).

"Baltimore: Some IDU prevalence estimates for this MSA are unusually high compared to project estimates of IDU prevalence. Local data sources indicate that these elevated prevalences are likely accurate, and might be produced by adverse social conditions, such as high unemployment and a limited treatment system. For the purposes of program planning, policy development, and other local activities within this MSA, project estimates should be used in concert with other local data sources (we note that this may require local data collection if no existing alternative data sources are available).

^ Portland-Vancouver: Some IDU prevalence estimates for this MSA are unusually high compared to project estimates. For the purposes of program planning, policy development, and other local activities within this MSA, project estimates should be used in concert with other local data sources (we note that this may require local data collection if no existing alternative data sources are available).

~ San Francisco: Some IDU prevalence estimates for this MSA are unusually high compared to project estimates. Project estimates might be slightly inflated, though in the correct range. A possible cause of the elevated prevalence in this MSA during the internet boom, which elevated real estate prices. For the purposes of program planning, policy development, and other local activities within this MSA, project estimates should be used in concert with other local data sources (we note that this may require local data collection if no existing alternative data sources are available).

` Stockton-Lodi: Some IDU prevalence estimates for this MSA are unusually high compared to project estimates. Local data sources indicate that this MSA had an unusually large number of methadone maintenance treatment slots during the study period. For the purposes of program planning, policy development, and other local activities within this MSA, project estimates should be used in concert with other local data sources (we note that this may require local data collection if no existing alternative data sources are available).

# Tucson: This IDU prevalence estimate is unusually high compared to project estimates of IDU prevalence in other areas, though she could not identify a reason for this upward bias. Local planning efforts for this MSA should perhaps gather additional data to support these efforts if needed.

### 5 Large US Metropolitan Statistical Areas (1992-2002) as Estimated Using the Index

late validity, caution should be used in interpreting and applying and other local activities within specific MSAs, project estimates (a collection if no existing data sources are available).

| 1997 | 1998 | 1999 | 2000 | 2001 | 2002 |
|------|------|------|------|------|------|
| 155  | 153  | 175  | 150  | 168  | 145  |
| 218  | 207  | 183  | 197  | 163  | 189  |
| 205  | 199  | 199  | 190  | 190  | 177  |
| 546* | 498* | 531* | 404* | 440* | 312* |
| 107  | 105  | 97   | 95   | 93   | 91   |
| 112  | 100  | 94   | 76   | 72   | 55   |
| 274  | 220  | 203  | 148  | 138  | 99   |
| 274  | 246  | 239  | 196  | 190  | 149  |
| 543" | 563" | 596" | 600" | 629" | 628" |
| 186  | 184  | 189  | 192  | 190  | 201  |
|      |      |      |      |      |      |
| 272  | 269  | 187  | 260  | 177  | 253  |
| 275  | 255  | 208  | 215  | 170  | 181  |
| 72   | 74   | 81   | 68   | 70   | 59   |
| 119  | 113  | 122  | 100  | 108  | 82   |
| 141  | 138  | 157  | 132  | 160  | 137  |
| 129  | 124  | 144  | 118  | 135  | 109  |
| 183  | 178  | 195  | 172  | 186  | 165  |
| 246  | 240  | 265  | 225  | 248  | 211  |
| 187  | 178  | 193  | 149  | 158  | 112  |
| 157  | 158  | 181  | 176  | 203  | 196  |
| 249  | 242  | 184  | 225  | 173  | 213  |
| 204  | 203  | 171  | 193  | 158  | 182  |
| 320  | 315  | 361  | 329  | 356  | 337  |
| 64   | 65   | 78   | 66   | 80   | 66   |
| 367  | 347  | 385  | 310  | 339  | 270  |
| 538  | 512  | 506  | 454  | 465  | 396  |
| 240  | 244  | 231  | 225  | 216  | 209  |
| 152  | 150  | 150  | 141  | 138  | 131  |
| 107  | 106  | 129  | 101  | 120  | 93   |
| 49   | 48   | 54   | 50   | 57   | 54   |
| 354  | 362  | 419  | 313  | 316  | 238  |
| 254  | 223  | 193  | 169  | 145  | 124  |
| 356  | 364  | 473  | 391  | 455  | 343  |
| 296  | 282  | 331  | 248  | 288  | 215  |
| 204  | 193  | 213  | 182  | 201  | 173  |
| 178  | 173  | 200  | 163  | 191  | 153  |
| 240  | 223  | 240  | 226  | 241  | 238  |
| 96   | 98   | 111  | 101  | 113  | 103  |
| 246  | 216  | 230  | 177  | 179  | 136  |
| 224  | 200  | 203  | 171  | 180  | 150  |
| 125  | 117  | 116  | 100  | 103  | 85   |
| 258  | 253  | 235  | 239  | 232  | 224  |
| 244  | 229  | 242  | 194  | 208  | 162  |
| 61   | 61   | 72   | 65   | 77   | 69   |

web\_app\_bl

|       |       |       |       |       |       |
|-------|-------|-------|-------|-------|-------|
| 125   | 121   | 138   | 113   | 129   | 110   |
| 152   | 142   | 132   | 124   | 113   | 105   |
| 123   | 128   | 141   | 131   | 148   | 136   |
| 155   | 148   | 167   | 132   | 155   | 122   |
| 235   | 223   | 190   | 196   | 152   | 167   |
| 196   | 194   | 220   | 186   | 207   | 179   |
| 124   | 121   | 93    | 112   | 79    | 100   |
| 237   | 213   | 184   | 166   | 141   | 124   |
| 213   | 212   | 257   | 203   | 238   | 185   |
| 209   | 202   | 184   | 194   | 174   | 189   |
| 260   | 244   | 230   | 213   | 190   | 186   |
| 153   | 155   | 183   | 159   | 184   | 163   |
| 435   | 442   | 421   | 448   | 447   | 456   |
| 53    | 46    | 40    | 34    | 29    | 23    |
| 84    | 79    | 83    | 76    | 79    | 73    |
| 182   | 175   | 148   | 144   | 106   | 102   |
| 113   | 112   | 132   | 110   | 124   | 104   |
| 273   | 267   | 291   | 260   | 290   | 257   |
| 215   | 219   | 244   | 235   | 274   | 257   |
| 336   | 349   | 403   | 366   | 386   | 353   |
| 598^  | 557^  | 457^  | 495^  | 426^  | 445^  |
| 226   | 221   | 118   | 203   | 111   | 193   |
| 164   | 160   | 178   | 142   | 160   | 123   |
|       |       |       | 127   | 125   | 105   |
| 107   | 97    | 80    | 73    | 59    | 50    |
| 188   | 166   | 156   | 135   | 126   | 105   |
| 284   | 279   | 253   | 237   | 213   | 186   |
| 153   | 154   | 177   | 154   | 180   | 156   |
| 435   | 388   | 300   | 292   | 254   | 214   |
| 215   | 191   | 173   | 144   | 130   | 105   |
| 262   | 249   | 229   | 204   | 183   | 156   |
| 1011~ | 1059~ | 1033~ | 1153~ | 1175~ | 1218~ |
| 254   | 231   | 235   | 194   | 190   | 151   |
| 149   | 151   | 176   | 152   | 175   | 147   |
| 283   | 249   | 192   | 232   | 196   | 240   |
| 347   | 340   | 311   | 330   | 305   | 328   |
| 293   | 294   | 243   | 295   | 244   | 298   |
| 590`  | 566`  | 517`  | 495`  | 462`  | 403`  |
| 185   | 171   | 178   | 159   | 165   | 146   |
| 241   | 234   | 219   | 225   | 224   | 217   |
| 167   | 167   | 196   | 166   | 193   | 163   |
| 133   | 136   | 150   | 140   | 158   | 147   |
| 631#  | 594#  | 593#  | 569#  | 562#  | 539#  |
| 70    | 63    | 59    | 47    | 44    | 32    |
| 179   | 176   | 135   | 160   | 125   | 139   |
| 165   | 168   | 169   | 159   | 160   | 150   |
| 119   | 116   | 141   | 135   | 168   | 162   |
| 150   | 147   | 129   | 139   | 124   | 132   |
| 253   | 237   | 217   | 179   | 148   | 119   |
| 127   | 134   | 163   | 142   | 173   | 147   |

ject estimates of IDU prevalence in other MSAs. Conversations with  
ed many referrals from the local jails and prisons during the study  
ses of program planning, policy development, and other local  
this may require local data collection if no existing alternative data

J prevalence in other MSAs. Conversations with a local expert  
easy access to drugs, and a poor (though recently improving) drug  
MSA, project estimates should be used in concert with other local  
le).

nates of IDU prevalence in other MSAs. For the purposes of  
d in concert with other local data sources (we note that this may

of IDU prevalence in other MSAs. A local expert concluded that  
ice is the exodus of middle-class non-injecting Black residents from  
cy development, and other local activities within this MSA, project  
ion if no existing alternative data sources are available).

of IDU prevalence in other MSAs. Conversations with a local expert  
y period. Project estimates of the total number of injectors in the  
revalence. For the purposes of program planning, policy  
al data sources (we note that this may require local data collection if

er MSAs. A local expert indicated that she felt that the estimates  
uld thus use project estimates in concert with other local sources,
