# Supplementary material
Source: PubMed Central journal article supplement (PMC2587642)
Supplement: 11524_2008_9304_MOESM5_ESM.pdf [file 11524_2008_9304_MOESM5_ESM.pdf]

**Web Appendix Table 2. Estimated Prevalence of Injection Drug Use per 10,000 White Adult Resi**

While analyses indicate that project estimates of White IDU prevalence in the 95 MSAs in the sample r project estimates for a specific MSA or set of MSAs. For the purposes of program planning, policy deve should be used in concert with other local data sources whenever possible (we note that this may requir

| <b>MSA name</b>                           | <b>1992</b> | <b>1993</b> | <b>1994</b> | <b>1995</b> |
|-------------------------------------------|-------------|-------------|-------------|-------------|
| Akron, OH                                 | 49          | 44          | 50          | 45          |
| Albany--Schenectady--Troy, NY             | 38          | 35          | 36          | 34          |
| Albuquerque, NM                           | 173         | 162         | 168         | 158         |
| Allentown--Bethlehem--Easton, PA          | 93          | 85          | 103         | 92          |
| Ann Arbor, MI                             | 32          | 30          | 30          | 30          |
| Atlanta, GA                               | 62          | 59          | 64          | 60          |
| Austin--San Marcos, TX                    | 209         | 185         | 211         | 180         |
| Bakersfield, CA                           | 325         | 301         | 324         | 304         |
| Baltimore, MD                             | 83          | 103         | 108         | 125         |
| Bergen--Passaic, NJ                       | 85          | 85          | 79          | 77          |
| Birmingham, AL                            |             | 46          |             |             |
| Boston, MA--NH                            | 63          | 86          | 68          | 95          |
| Buffalo--Niagara Falls, NY                | 28          | 35          | 33          | 41          |
| Charleston--North Charleston, SC          | 60          | 48          | 53          | 43          |
| Charlotte--Gastonia--Rock Hill, NC--SC    | 71          | 58          | 66          | 56          |
| Chicago, IL                               | 44          | 38          | 44          | 38          |
| Cincinnati, OH--KY--IN                    | 65          | 54          | 63          | 52          |
| Cleveland--Lorain--Elyria, OH             | 48          | 41          | 45          | 39          |
| Columbus, OH                              | 63          | 57          | 66          | 59          |
| Dallas, TX                                | 132         | 110         | 135         | 118         |
| Dayton--Springfield, OH                   | 46          | 39          | 42          | 36          |
| Denver, CO                                | 138         | 123         | 128         | 128         |
| Detroit, MI                               | 55          | 56          | 54          | 59          |
| El Paso, TX                               | 332         | 271         | 310         | 252         |
| Fort Lauderdale, FL                       | 125         | 101         | 119         | 96          |
| Fort Worth--Arlington, TX                 | 230         | 189         | 222         | 185         |
| Fresno, CA                                | 244         | 342         | 255         | 316         |
| Gary, IN                                  | 93          | 78          | 95          | 88          |
| Grand Rapids--Muskegon--Holland, MI       | 35          | 29          | 33          | 29          |
| Greensboro--Winston-Salem--High Point, NC | 76          | 60          | 70          | 56          |
| Greenville--Spartanburg--Anderson, SC     | 47          | 37          | 44          | 36          |
| Harrisburg--Lebanon--Carlisle, PA         | 52          | 49          | 63          | 60          |
| Hartford, CT                              | 91          | 92          | 95          | 94          |
| Honolulu, HI                              | 172         | 166         | 193         | 178         |
| Houston, TX                               | 227         | 171         | 208         | 157         |
| Indianapolis, IN                          | 67          | 62          | 66          | 58          |
| Jacksonville, FL                          | 136         | 100         | 123         | 95          |
| Jersey City, NJ                           | 288         | 230         | 243         | 191         |
| Kansas City, MO--KS                       | 74          | 66          | 72          | 63          |
| Knoxville, TN                             | 76          | 71          | 82          | 73          |
| Las Vegas, NV--AZ                         | 220         | 176         | 208         | 172         |
| Little Rock--North Little Rock, AR        | 150         | 130         | 150         | 136         |
| Los Angeles--Long Beach, CA               | 184         | 202         | 181         | 198         |
| Louisville, KY--IN                        | 100         | 87          | 119         | 105         |

|                                               |     |     |     |     |
|-----------------------------------------------|-----|-----|-----|-----|
| Memphis, TN--AR--MS                           | 71  | 71  | 71  | 68  |
| Miami, FL                                     | 247 | 183 | 210 | 156 |
| Middlesex--Somerset--Hunterdon, NJ            | 67  | 66  | 63  | 62  |
| Milwaukee--Waukesha, WI                       | 44  | 38  | 47  | 41  |
| Minneapolis--St. Paul, MN--WI                 | 45  | 37  | 43  | 36  |
| Monmouth--Ocean, NJ                           | 88  | 76  | 81  | 73  |
| Nashville, TN                                 | 74  | 69  | 86  | 78  |
| Nassau--Suffolk, NY                           | 51  | 50  | 50  | 53  |
| New Haven--Meriden, CT                        | 110 | 104 | 108 | 106 |
| New Orleans, LA                               | 166 | 135 | 170 | 139 |
| New York, NY                                  | 125 | 126 | 118 | 119 |
| Newark, NJ                                    | 90  | 79  | 86  | 77  |
| Norfolk--Virginia Beach--Newport News, VA--NC | 71  | 68  | 79  | 72  |
| Oakland, CA                                   | 164 | 181 | 147 | 161 |
| Oklahoma City, OK                             | 113 | 121 | 104 | 106 |
| Omaha, NE--IA                                 | 49  | 52  | 51  | 52  |
| Orange County, CA                             | 133 | 143 | 121 | 129 |
| Orlando, FL                                   | 65  | 58  | 68  | 59  |
| Philadelphia, PA--NJ                          | 97  | 95  | 107 | 102 |
| Phoenix--Mesa, AZ                             | 106 | 101 | 101 | 95  |
| Pittsburgh, PA                                | 50  | 47  | 56  | 52  |
| Portland--Vancouver, OR--WA                   | 176 | 191 | 167 | 188 |
| Providence--Fall River--Warwick, RI--MA       | 80  | 92  | 73  | 99  |
| Raleigh--Durham--Chapel Hill, NC              | 79  | 60  | 67  | 52  |
| Richmond--Petersburg, VA                      | 86  | 72  | 87  | 74  |
| Riverside--San Bernardino, CA                 | 176 | 193 | 155 | 173 |
| Rochester, NY                                 | 38  | 35  | 41  | 38  |
| Sacramento, CA                                | 184 | 194 | 171 | 182 |
| St. Louis, MO--IL                             | 71  | 55  | 63  | 50  |
| Salt Lake City--Ogden, UT                     | 66  | 92  | 79  | 112 |
| San Antonio, TX                               | 202 | 167 | 166 | 137 |
| San Diego, CA                                 | 135 | 155 | 140 | 152 |
| San Francisco, CA                             | 302 | 327 | 288 | 315 |
| San Jose, CA                                  | 155 | 138 | 140 | 122 |
| Sarasota--Bradenton, FL                       | 96  | 89  | 105 | 96  |
| Scranton--Wilkes-Barre--Hazleton, PA          | 37  | 37  | 38  | 40  |
| Seattle--Bellevue--Everett, WA                | 149 | 191 | 165 | 194 |
| Springfield, MA                               | 86  | 92  | 86  | 97  |
| Stockton--Lodi, CA                            | 228 | 230 | 242 | 264 |
| Syracuse, NY                                  | 45  | 38  | 42  | 35  |
| Tacoma, WA                                    | 123 | 165 | 126 | 158 |
| Tampa--St. Petersburg--Clearwater, FL         | 113 | 90  | 109 | 89  |
| Toledo, OH                                    | 46  | 41  | 49  | 43  |
| Tucson, AZ                                    | 183 | 182 | 183 | 180 |
| Tulsa, OK                                     | 82  | 79  | 89  | 88  |
| Ventura, CA                                   | 96  | 111 | 89  | 106 |
| Washington, DC--MD--VA--WV                    | 80  | 67  | 76  | 68  |
| West Palm Beach--Boca Raton, FL               | 173 | 134 | 164 | 130 |
| Wichita, KS                                   | 42  | 46  | 45  | 49  |
| Wilmington--Newark, DE--MD                    | 124 | 97  | 133 | 117 |
| Youngstown--Warren, OH                        | 23  | 25  | 29  | 29  |

**Estimates of 95 Large US Metropolitan Statistical Areas (1992-2002) as Estimated Using the Index**

have adequate validity, caution should be used in interpreting and applying development, and other local activities within specific MSAs, project estimates (see local data collection if no existing data sources are available).

| 1996 | 1997 | 1998 | 1999 | 2000 | 2001 | 2002 |
|------|------|------|------|------|------|------|
| 45   | 46   | 47   | 56   | 51   | 61   | 56   |
| 35   | 33   | 34   | 31   | 35   | 31   | 38   |
| 156  | 154  | 154  | 159  | 154  | 159  | 153  |
| 94   | 96   | 97   | 116  | 96   | 117  | 95   |
| 30   | 30   | 31   | 30   | 32   | 32   | 33   |
| 60   | 59   | 58   | 61   | 55   | 58   | 50   |
| 171  | 155  | 139  | 144  | 113  | 115  | 90   |
| 305  | 311  | 314  | 351  | 324  | 359  | 328  |
| 136  | 148  | 163  | 184  | 199  | 223  | 239  |
| 73   | 70   | 68   | 69   | 68   | 65   | 67   |
| 49   |      |      |      |      |      |      |
| 100  | 106  | 112  | 82   | 120  | 86   | 128  |
| 43   | 45   | 47   | 42   | 47   | 41   | 48   |
| 42   | 43   | 45   | 51   | 46   | 51   | 47   |
| 55   | 54   | 53   | 61   | 54   | 64   | 54   |
| 38   | 37   | 38   | 46   | 40   | 50   | 44   |
| 51   | 50   | 51   | 63   | 55   | 67   | 58   |
| 38   | 38   | 39   | 44   | 41   | 46   | 42   |
| 59   | 60   | 62   | 73   | 67   | 81   | 76   |
| 121  | 127  | 134  | 165  | 149  | 192  | 168  |
| 35   | 34   | 35   | 41   | 41   | 48   | 48   |
| 131  | 134  | 136  | 104  | 126  | 95   | 116  |
| 61   | 63   | 64   | 56   | 66   | 57   | 68   |
| 242  | 234  | 217  | 228  | 183  | 173  | 146  |
| 95   | 92   | 89   | 104  | 85   | 100  | 81   |
| 183  | 181  | 178  | 208  | 175  | 205  | 173  |
| 313  | 313  | 315  | 326  | 302  | 316  | 273  |
| 93   | 99   | 104  | 105  | 111  | 114  | 118  |
| 29   | 28   | 29   | 31   | 31   | 32   | 32   |
| 53   | 53   | 52   | 64   | 51   | 60   | 47   |
| 36   | 36   | 36   | 41   | 38   | 43   | 40   |
| 68   | 81   | 93   | 117  | 95   | 104  | 85   |
| 95   | 93   | 91   | 88   | 86   | 83   | 82   |
| 183  | 190  | 197  | 248  | 208  | 264  | 211  |
| 151  | 145  | 137  | 160  | 121  | 140  | 104  |
| 56   | 54   | 55   | 65   | 60   | 71   | 66   |
| 93   | 92   | 93   | 111  | 95   | 116  | 97   |
| 171  | 152  | 141  | 152  | 143  | 151  | 150  |
| 62   | 61   | 57   | 59   | 49   | 50   | 41   |
| 75   | 77   | 76   | 89   | 76   | 85   | 73   |
| 170  | 170  | 167  | 181  | 155  | 167  | 142  |
| 137  | 140  | 141  | 148  | 134  | 144  | 125  |
| 196  | 194  | 193  | 184  | 192  | 190  | 187  |
| 112  | 119  | 123  | 144  | 129  | 155  | 136  |

web\_app\_wh

|     |     |     |     |     |     |     |
|-----|-----|-----|-----|-----|-----|-----|
| 67  | 67  | 70  | 87  | 79  | 96  | 88  |
| 145 | 131 | 125 | 139 | 110 | 118 | 94  |
| 60  | 59  | 59  | 60  | 62  | 63  | 65  |
| 43  | 43  | 45  | 48  | 43  | 47  | 41  |
| 35  | 37  | 38  | 47  | 40  | 51  | 43  |
| 72  | 72  | 74  | 69  | 77  | 66  | 80  |
| 82  | 86  | 88  | 102 | 89  | 102 | 90  |
| 55  | 57  | 60  | 49  | 63  | 48  | 65  |
| 107 | 109 | 109 | 104 | 103 | 93  | 89  |
| 140 | 142 | 145 | 181 | 151 | 189 | 157 |
| 116 | 112 | 108 | 98  | 101 | 88  | 92  |
| 77  | 76  | 76  | 77  | 78  | 75  | 80  |
| 73  | 75  | 74  | 84  | 71  | 80  | 68  |
| 155 | 151 | 145 | 127 | 124 | 110 | 101 |
| 99  | 94  | 93  | 93  | 93  | 95  | 95  |
| 52  | 50  | 52  | 58  | 57  | 64  | 63  |
| 124 | 122 | 121 | 108 | 116 | 97  | 109 |
| 60  | 61  | 62  | 76  | 67  | 79  | 70  |
| 105 | 107 | 111 | 129 | 123 | 146 | 139 |
| 93  | 91  | 95  | 107 | 105 | 125 | 119 |
| 53  | 54  | 56  | 65  | 62  | 70  | 71  |
| 186 | 186 | 188 | 164 | 188 | 170 | 186 |
| 102 | 106 | 109 | 61  | 106 | 58  | 101 |
| 49  | 46  | 44  | 48  | 39  | 45  | 35  |
| 75  |     |     |     | 84  | 92  | 86  |
| 168 | 168 | 165 | 147 | 148 | 131 | 121 |
| 39  | 40  | 41  | 46  | 47  | 53  | 55  |
| 178 | 178 | 174 | 160 | 154 | 143 | 131 |
| 47  | 45  | 45  | 51  | 43  | 50  | 43  |
| 123 | 130 | 129 | 113 | 126 | 125 | 121 |
| 124 | 113 | 106 | 101 | 89  | 84  | 73  |
| 152 | 154 | 152 | 152 | 153 | 153 | 151 |
| 308 | 301 | 291 | 262 | 273 | 258 | 253 |
| 110 | 99  | 90  | 93  | 79  | 82  | 69  |
| 100 | 104 | 108 | 131 | 119 | 144 | 129 |
| 42  | 43  | 43  | 37  | 46  | 40  | 50  |
| 193 | 190 | 187 | 168 | 175 | 156 | 162 |
| 102 | 107 | 114 | 97  | 124 | 107 | 136 |
| 281 | 300 | 313 | 317 | 339 | 370 | 379 |
| 34  | 33  | 32  | 33  | 30  | 32  | 29  |
| 155 | 152 | 152 | 144 | 151 | 151 | 148 |
| 89  | 90  | 91  | 109 | 93  | 110 | 94  |
| 44  | 45  | 49  | 57  | 56  | 66  | 65  |
| 180 | 179 | 176 | 175 | 169 | 170 | 163 |
| 92  | 97  | 96  | 101 | 92  | 100 | 86  |
| 103 | 102 | 104 | 84  | 106 | 90  | 109 |
| 68  | 68  | 68  | 70  | 68  | 69  | 67  |
| 129 | 129 | 126 | 143 | 117 | 126 | 106 |
| 51  | 53  | 56  | 54  | 62  | 59  | 68  |
| 128 | 140 | 150 | 165 | 165 | 170 | 178 |
| 32  | 35  | 38  | 50  | 46  | 59  | 53  |
